# Supplementary figures and images for: Visualization and Quantification of the Extracellular Matrix in Prostate Cancer Using an Elastin Specific Molecular Probe
Source: MDPI journal article supplement (doi:10.3390/biology10111217), 2021-11-22

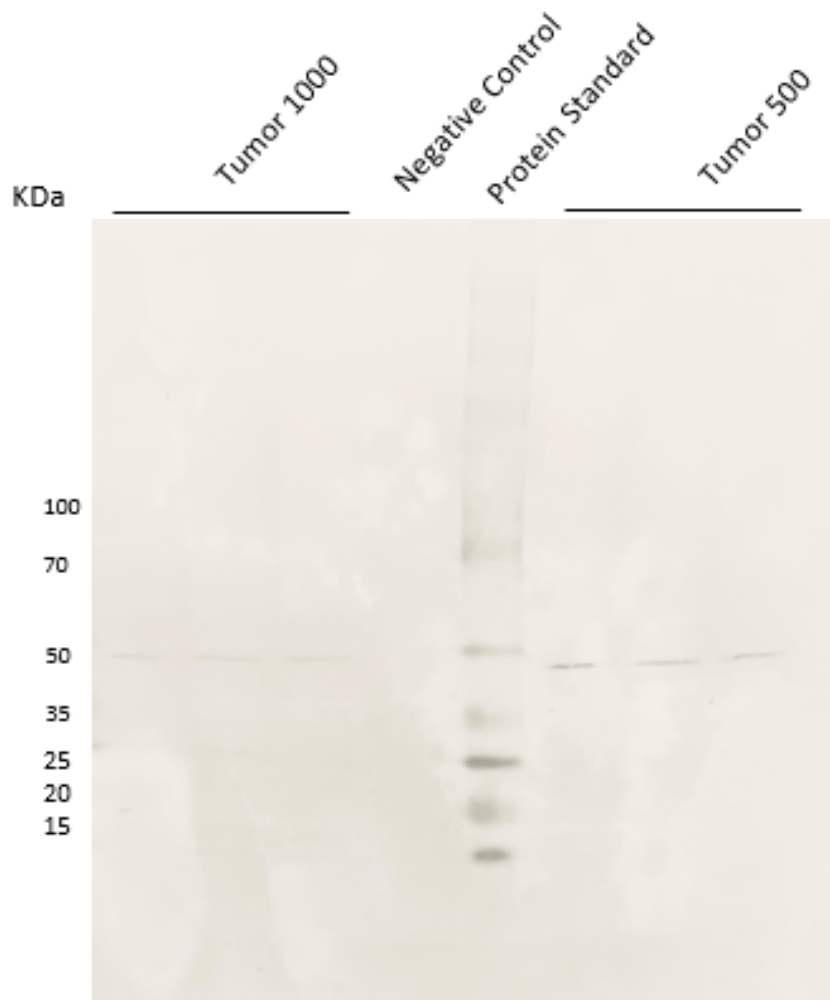

Elastin-E11

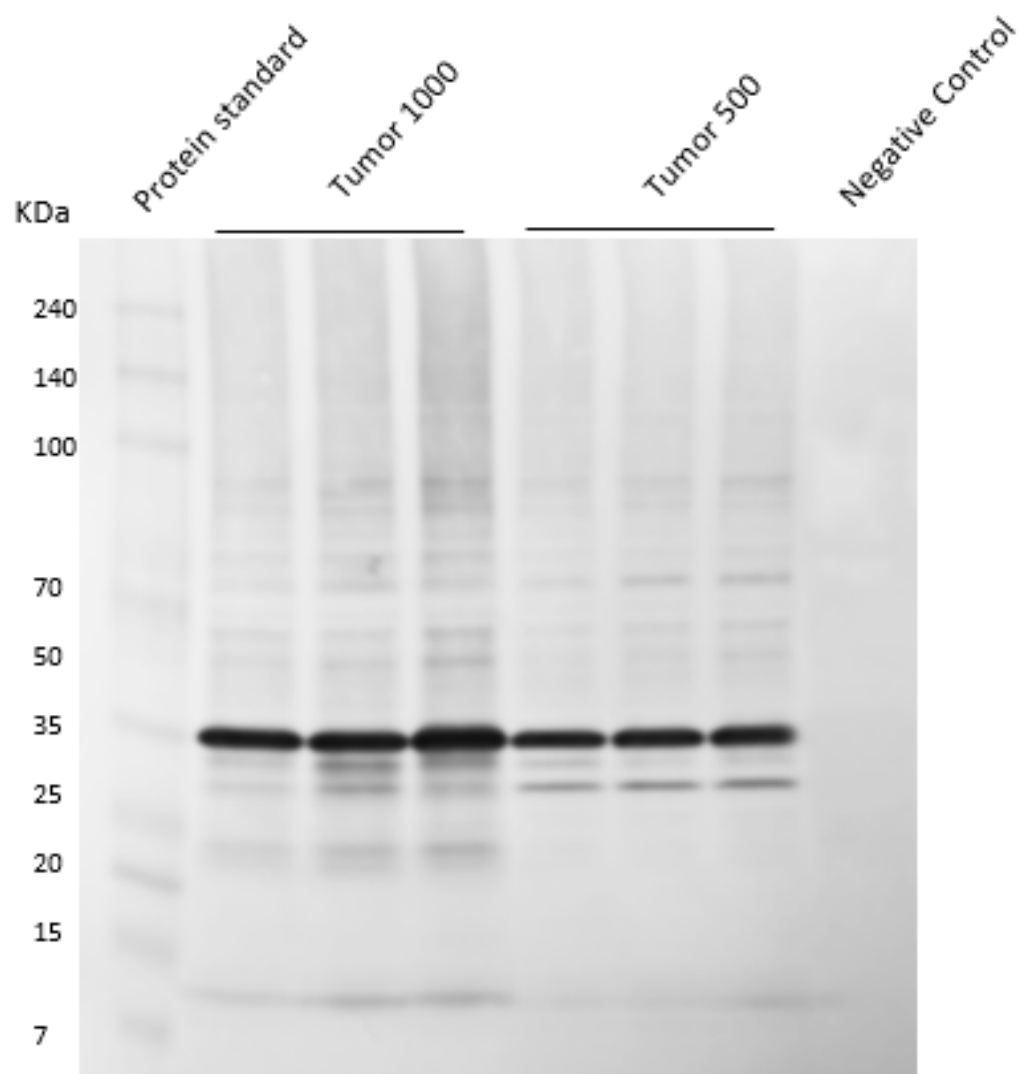

GAPDH

Supplement: s1 [file s1]
